# Supplementary material for: Six Year Refractive Change among White Children and Young Adults: Evidence for Significant Increase in Myopia among White UK Children
Source: PubMed Central journal article supplement (PMC4718680; doi:10.1371/journal.pone.0146332), 2016-01-19
Supplement: pone.0146332.s001.pdf [file pone.0146332.s001.pdf]

**S1 Table**

| ID              | Change in SER (D) | Change in AL (mm) | Change in Corneal Power (D) | Change in ACD (mm) |
|-----------------|-------------------|-------------------|-----------------------------|--------------------|
| <b>BB14</b>     | <b>-0.875</b>     | <b>1.220</b>      | <b>-0.186</b>               | <b>0.100</b>       |
| BB15            | -1.000            | 1.120             | -0.093                      | 0.210              |
| BB21            | -1.875            | 1.390             | 0.030                       | 0.230              |
| BB23            | -1.125            | 0.930             | -0.089                      | 0.220              |
| BB24            | -1.750            | 1.930             | -0.251                      | 0.510              |
| BB28            | -3.125            | 1.940             | -0.304                      | 0.210              |
| BB37            | -2.375            | 1.840             | -0.075                      | 0.320              |
| BKeel12         | -2.875            | 1.840             | -0.023                      | 0.200              |
| <b>BKeel25</b>  | <b>-0.625</b>     | <b>1.090</b>      | <b>0.080</b>                | <b>0.160</b>       |
| BKY01           | -1.750            | 1.520             | 0.070                       | 0.260              |
| BKY04           | -1.250            | 1.610             | -0.214                      | 0.320              |
| BM12            | -0.625            | 0.690             | -0.052                      | 0.170              |
| CH10            | -1.375            | 1.140             | 0.103                       | 0.190              |
| DH04            | -2.375            | .                 | .                           | .                  |
| DH13            | -1.250            | 0.950             | -0.019                      | 0.130              |
| DHCM1006        | -1.750            | 0.912             | -0.217                      | 0.110              |
| <b>DHCM2005</b> | <b>-0.125</b>     | <b>0.940</b>      | <b>-0.292</b>               | <b>-1.120</b>      |
| DR14            | -1.250            | 1.110             | 0.065                       | 0.170              |
| GH23            | -2.375            | 1.660             | 0.06                        | 0.390              |
| GH28            | -1.250            | 1.140             | -0.045                      | 0.280              |
| HB04            | -2.500            | 1.920             | 0.205                       | 0.290              |
| HB19            | -0.625            | 0.710             | -0.098                      | 0.150              |
| LCEN007         | -2.75             | 2.100             | -0.174                      | 0.240              |
| <b>LCEN021</b>  | <b>-2.875</b>     | <b>1.870</b>      | <b>-0.06</b>                | <b>0.210</b>       |
| LCEN036         | -2.750            | 1.840             | 0.029                       | 0.290              |
| LIS08           | -1.125            | 0.910             | -0.303                      | 0.070              |
| LIS09           | -0.750            | 1.090             | 0.355                       | 0.980              |
| LIS19           | -1.125            | 0.890             | 0.064                       | 0.220              |
| LIS32           | -0.875            | 1.180             | -0.189                      | 0.230              |
| PR10            | -1.500            | 0.620             | 0.102                       | 0.160              |
| SJ01            | -2.500            | 1.410             | -0.267                      | 0.120              |
