# Supplementary material for: Six Year Refractive Change among White Children and Young Adults: Evidence for Significant Increase in Myopia among White UK Children
Source: PubMed Central journal article supplement (PMC4718680; doi:10.1371/journal.pone.0146332), 2016-01-19
Supplement: pone.0146332.s002.pdf [file pone.0146332.s002.pdf]

**S2 Table**

| id       | Change in SER (DS) | Change in AL (mm) | Change in Corneal Power (D) | Change in ACD (mm) |
|----------|--------------------|-------------------|-----------------------------|--------------------|
| BA01     | 0.375              | 0.220             | 0.007                       | -0.080             |
| BA06     | -1.250             | 0.570             | -0.229                      | 0.020              |
| BA07     | -2.125             | 1.240             | -0.198                      | -0.020             |
| BA18     | -0.500             | 0.410             | 0.028                       | 0.120              |
| BA24     | -0.625             | 0.010             | 0.358                       | -0.150             |
| BA29     | -0.125             | 0.080             | 0.017                       | -0.010             |
| BA56     | -0.375             | 0.590             | -0.064                      | 0.010              |
| BA64     | -1.000             | 0.450             | -0.228                      | 0.090              |
| BC08     | 0.375              | 0.060             | 0.017                       | -0.020             |
| CHS07    | -0.875             | 0.950             | -0.419                      | 0.200              |
| CHS10    | -1.250             | 0.580             | 0.140                       | 0.070              |
| CHS18    | -0.125             | 0.540             | 0.108                       | 0.150              |
| CHS21    | -0.500             | 0.380             | -0.071                      | -0.100             |
| CHS23    | -0.875             | 0.250             | 0.066                       | -0.080             |
| CHS24    | -0.625             | 0.450             | -0.017                      | -0.090             |
| CHS31    | 1.125              | 0.080             | -0.223                      | -0.040             |
| CI08     | -0.625             | 0.520             | -0.076                      | 0.060              |
| CI18     | -1.000             | 0.680             | -0.028                      | 0.140              |
| CI35     | -3.125             | 1.440             | -0.289                      | 0.050              |
| CI61     | -0.750             | 0.400             | -0.001                      | 0.130              |
| LC05     | -0.625             | 0.760             | -0.066                      | 0.060              |
| LC09     | -1.500             | 0.800             | 0.175                       | 0.160              |
| LC17     | -1.250             | 0.490             | 1.123                       | 0.060              |
| LC32     | 0.000              | 0.380             | -0.031                      | -0.030             |
| LC37     | -0.875             | 0.500             | 0.118                       | 0.010              |
| LG01     | 0.000              | 0.160             | 0.073                       | 0.040              |
| LG09     | 0.250              | 0.290             | 0.478                       | 0.010              |
| LG17     | -0.250             | 0.440             | 0.408                       | 0.130              |
| LG28     | 0.000              | 0.680             | -0.098                      | 0.060              |
| LG29     | -0.125             | 0.550             | -0.111                      | 0.080              |
| LG33     | -0.875             | 0.620             | -0.167                      | 0.120              |
| NCIC1005 | -0.750             | 0.290             | -0.075                      | 0.090              |
| NCIC1009 | -1.500             | 0.970             | 0.135                       | 0.040              |
| NCIC1012 | 1.125              | 0.167             | -0.053                      | -0.010             |
| NCIC2035 | -0.500             | 0.370             | -0.335                      | 0.120              |
| SIC015   | -0.250             | 0.210             | 0.22                        | 0.010              |
| SM24     | -1.625             | 0.930             | -0.038                      | 0.070              |
| SP022    | -0.375             | 0.140             | -0.414                      | 1.450              |
| SP040    | -0.750             | 0.350             | -0.115                      | 0.020              |
| SP051    | -1.500             | 0.720             | 0.090                       | .                  |
| STJ01    | 0.000              | 0.190             | -0.246                      | 0.000              |
| STL10    | 0.250              | -0.050            | -0.006                      | 0.120              |
| STL18    | -0.375             | 0.340             | -0.130                      | 0.160              |
| STL22    | -1.500             | 0.770             | -0.013                      | 0.150              |
| STL37    | 0.250              | 0.180             | 0.069                       | -0.010             |
