# Supplementary material for: Six Year Refractive Change among White Children and Young Adults: Evidence for Significant Increase in Myopia among White UK Children
Source: PubMed Central journal article supplement (PMC4718680; doi:10.1371/journal.pone.0146332), 2016-01-19
Supplement: pone.0146332.s003.pdf [file pone.0146332.s003.pdf]

**S3 Table**

| id       | Change in SER (DS) | Change in AL (mm) | Change in Corneal Power (D) | Change in ACD (mm) |
|----------|--------------------|-------------------|-----------------------------|--------------------|
| BB02     | 0.375              | 0.280             | 0.006                       | -0.060             |
| BB05     | -0.250             | 0.700             | -0.284                      | 0.230              |
| BB06     | -0.125             | 0.460             | -0.056                      | 0.150              |
| BB17     | 0.500              | 0.450             | -0.175                      | 0.050              |
| BB25     | -0.375             | 0.800             | -0.219                      | 0.170              |
| BB32     | -0.625             | 1.140             | -0.252                      | 0.190              |
| BB38     | 0.625              | 0.490             | 0.08                        | 0.090              |
| BKY02    | 0.000              | 0.590             | -0.128                      | 0.140              |
| BKY05    | -0.500             | 0.760             | 0.071                       | 0.110              |
| BM08     | -1.750             | 1.030             | 0.027                       | 0.240              |
| BM19     | -1.875             | 0.800             | 0.256                       | 0.250              |
| BS01     | -0.875             | 0.410             | -0.139                      | 0.030              |
| BS06     | 1.125              | 0.200             | -0.112                      | 0.090              |
| CH01     | -0.875             | 1.120             | 0.105                       | 0.170              |
| CH04     | -0.375             | 0.650             | -0.003                      | 0.060              |
| CH06     | 0.750              | 0.370             | -0.587                      | 0.030              |
| CH11     | -1.125             | 1.330             | -0.206                      | 0.400              |
| DH14     | -1.000             | 0.750             | 0.237                       | 0.120              |
| DH18     | 0.500              | 0.610             | -0.350                      | 0.020              |
| DHCM2006 | 0.375              | 0.442             | 0.071                       | 0.020              |
| DR05     | -0.875             | 0.740             | -0.166                      | 0.110              |
| DR07     | -1.500             | 1.120             | -0.123                      | 0.180              |
| DR12     | -0.750             | 0.880             | -0.230                      | 0.000              |
| DR15     | -0.500             | 1.230             | -0.202                      | 0.270              |
| DR17     | -0.750             | 0.800             | 0.006                       | 0.200              |
| DR22     | -0.875             | 0.800             | .                           | .                  |
| GH03     | -1.250             | 1.020             | -0.473                      | 0.120              |
| GH04     | -0.750             | 0.560             | 0.193                       | 0.080              |
| LCEN012  | -1.625             | 0.830             | -0.197                      | 0.180              |
| LCEN014  | -0.875             | 0.960             | -0.228                      | 0.100              |
| LCEN016  | -0.750             | 0.640             | 0.127                       | 0.060              |
| LCEN025  | 0.375              | 0.630             | -0.095                      | 0.160              |
| LCEN027  | 0.375              | 0.270             | -0.254                      | -0.030             |
| LIS03    | -1.125             | 0.870             | -0.495                      | 0.420              |
| LIS04    | -0.375             | 0.540             | -0.372                      | 0.170              |
| LIS14    | -0.25              | 0.820             | -0.13                       | 0.180              |
| LIS20    | -1.375             | 0.810             | -0.106                      | 0.190              |
| LIS22    | -0.25              | 0.660             | -0.267                      | 0.130              |
| LIS24    | -0.375             | 0.820             | 0.230                       | 0.140              |
| LIS48    | -1.375             | 1.040             | -0.067                      | 0.210              |
| PR01     | -0.375             | 0.400             | -0.058                      | 0.090              |
| PR02     | -1.000             | 0.580             | 0.088                       | -0.090             |
| PR07     | 0.875              | 0.520             | -0.003                      | 0.080              |
| PR11     | -1.250             | 1.070             | -0.359                      | 0.180              |
| PR13     | -1.750             | 1.000             | 0.016                       | 0.240              |
| PR16     | -0.375             | 0.700             | 0.105                       | 0.230              |
