# Supplementary material for: Six Year Refractive Change among White Children and Young Adults: Evidence for Significant Increase in Myopia among White UK Children
Source: PubMed Central journal article supplement (PMC4718680; doi:10.1371/journal.pone.0146332), 2016-01-19
Supplement: pone.0146332.s004.pdf [file pone.0146332.s004.pdf]

**S4 Table**

| id       | Change in SER (DS) | Change in AL (mm) | Change in Corneal Power (D) | Change in ACD (mm) |
|----------|--------------------|-------------------|-----------------------------|--------------------|
| BA28     | -0.500             | 0.250             | -0.319                      | 0.050              |
| BA65     | -1.375             | 0.230             | -0.028                      | -0.200             |
| BC17     | -0.875             | 0.310             | -0.179                      | 0.000              |
| CHS12    | -0.250             | 0.290             | -0.615                      | 0.030              |
| CI13     | 0.375              | 0.030             | 0.041                       | 0.000              |
| CI27     | -0.250             | 0.320             | -0.145                      | 0.100              |
| CI58     | 1.125              | -0.020            | -0.139                      | -0.040             |
| CI60     | 0.750              | 0.180             | -0.378                      | 0.110              |
| ICC17    | -0.250             | 0.210             | 0.032                       | 0.020              |
| LC13     | -0.250             | 0.200             | -0.119                      | 0.000              |
| LC30     | 0.250              | 0.090             | 0.158                       | 0.040              |
| LC34     | 0.375              | 0.270             | 0.134                       | -0.020             |
| LHS26    | 0.250              | 0.130             | -0.169                      | -0.040             |
| NCIC1013 | 1.250              | -0.144            | 0.055                       | -0.040             |
| NCIC2034 | 0.000              | 0.300             | -0.255                      | 0.060              |
| NCIC2040 | -1.000             | 0.230             | -0.406                      | 0.010              |
| O01      | 1.000              | 0.110             | -0.222                      | -0.160             |
| O07      | -0.250             | 0.200             | 0.108                       | -0.070             |
| SIC034   | 0.125              | 0.230             | -0.163                      | -0.050             |
| SIC066   | 1.000              | 0.250             | 0.059                       | 0.060              |
| SIC073   | 1.750              | -0.260            | -0.082                      | -0.080             |
| SM26     | 0.875              | 0.250             | -0.115                      | -0.050             |
| SM27     | -0.125             | 0.310             | -0.049                      | -0.040             |
| SM30     | -1.250             | 0.730             | -0.086                      | 0.040              |
| SP007    | -0.125             | -0.030            | -0.054                      | 0.0900             |
| SP014    | 0.625              | 0.036             | -0.583                      | -0.110             |
| SP017    | -0.375             | 0.266             | 0.383                       | 0.020              |
| SP025    | 0.500              | 0.210             | -0.278                      | 0.000              |
| SP031    | 0.125              | 0.180             | 0.123                       | 0.060              |
| SP042    | -0.250             | 0.234             | 0.096                       | 0.000              |
| SP060    | -1.625             | 0.210             | 0.045                       | 0.050              |
| SP066    | 0.125              | 0.094             | 0.026                       | -0.070             |
| STL11    | 0.750              | 0.130             | -0.283                      | 0.000              |
| STL34    | 0.875              | -0.090            | 0.130                       | -0.110             |
